# Supplementary material for: Loss of Mir146b with aging contributes to inflammation and mitochondrial dysfunction in thioglycollate-elicited peritoneal macrophages
Source: eLife. 2021 Aug 23;10:e66703. doi: 10.7554/eLife.66703 (PMC8412946; doi:10.7554/eLife.66703)
Supplement: Figure 1—source data 1. [file elife-66703-fig1-data1.xlsx]

## Sheet: Sheet1
Figure 1 Source Data 1 pertaining to Figure 1-figure supplement 1
Percentage of cells double-positive for CD11b and F4/80
3months	20 months
95.3	95.2
95.5	96.7
95.4	97.9
94.4	95.3
94.3	93.5
