# Supplementary material for: Loss of Mir146b with aging contributes to inflammation and mitochondrial dysfunction in thioglycollate-elicited peritoneal macrophages
Source: eLife. 2021 Aug 23;10:e66703. doi: 10.7554/eLife.66703 (PMC8412946; doi:10.7554/eLife.66703)
Supplement: Figure 1—source data 3. — Numerical values are displayed in graphs for (B) Mir146b, (C) Mir22, (D) Mir15a, (E) Mir29a, (F) Mir423, (G) Mir146a, and (H) Mir18a. [file elife-66703-fig1-data3.xlsx]

## Sheet: Figure 1B
Figure 1-Source Data 3 pertaining to Figure 1-figure supplement 2B-H
qPCR
Sample	Relative Mir146b miRNA	Relative Mir22 miRNA	Relative Mir15a miRNA	Relative Mir29a miRNA	Relative Mir423 miRNA	Relative Mir146a miRNA	Relative Mir18a miRNA
3 months 1	0.988	2.259	2.025	2.502	2.289	1.859	1.733
3 months 2	0.891	1.404	1.175	0.924	1.145	0.982	0.974
3 months 3	1.351	0.241	0.504	0.416	0.429	0.725	0.782
3months 4	0.771	0.096	0.296	0.158	0.137	0.434	0.51
3 months 5	0.395	0.36	0.447	0.743	0.291	0.255	0.496
3 months 6	1.212	1.491	2.166	2.284	2.609	2.387	1.603
3 months 7	0.767	0.912	0.752	0.644	0.377	0.585	0.889
3 months 8	0.415	0.298	0.25	0.257	0.26	0.355	0.382
3 months 9	2.212	1.939	1.384	1.073	1.464	1.419	1.63
12 months 1	1.185	0.793	1.371	1.299	0.625	0.96	1.066
12 months 2	0.681	0.48	0.884	0.708	0.679	0.4	0.614
12 months 3	0.68	0.975	1.79	2.883	1.149	0.677	1.1
12 months 4	0.894	0.953	1.337	2.488	1.112	0.428	1.047
12 months 5	0.274	0.142	0.029	0.086	Undetermined	0.124	0.073
12 months 6	0.205	0.048	0.06	0.045	0.051	0.114	0.213
12 months 7	0.818	Undetermined	0.175	0.256	0.252	0.395	0.514
12 months 8	0.448	0.252	0.128	Undetermined	0.156	0.399	0.445
20 months 1	0.668	0.445	0.303	0.155	0.707	0.844	0.341
20 months 2	0.649	0.107	0.241	0.255	0.207	0.324	0.402
20 months 3	0.785	0.424	0.666	0.859	0.493	2.912	0.683
20 months 4	0.393	0.153	0.126	0.152	0.162	0.342	0.228
20 months 5	0.134	0.034	0.018	0.01	0.166	0.419	0.025
20 months 6	0.102	0.025	0.068	0.036	0.096	0.083	0.18
20 months 7	0.444	0.244	1.074	1.179	0.859	0.352	1.988
20 months 8	0.305	0.129	0.453	0.359	0.287	0.35	1.158
20 months 9	0.118	0.066	0.208	0.288	0.133	0.132	0.486
