# Supplementary material for: Loss of Mir146b with aging contributes to inflammation and mitochondrial dysfunction in thioglycollate-elicited peritoneal macrophages
Source: eLife. 2021 Aug 23;10:e66703. doi: 10.7554/eLife.66703 (PMC8412946; doi:10.7554/eLife.66703)
Supplement: Figure 1—source data 4. [file elife-66703-fig1-data4.xlsx]

## Sheet: Figure 1B
Figure 1-Source Data 4 pertaining to Fig. 1B
qPCR
Trial 1
Sample	Relative Mir146b miRNA
Young 1	1.3393
Young 2	1.03496
Young 3	0.625746
Old 1	0.324349
Old 2	0.463131
Old 3	0.14029
Trial 2
Young 4	0.350638
Young 5	1.6053
Young 6	1.04406
Old 4	0.370321
Old 5	0.669183
Old 6	0.421173
Trial 3
Young 7	0.126019
Young 8	2.24737
Young 9	0.626612
Old 7	0.107583
Old 8	0.0679068
Old 9	Undetermined
