# Supplementary material for: Loss of Mir146b with aging contributes to inflammation and mitochondrial dysfunction in thioglycollate-elicited peritoneal macrophages
Source: eLife. 2021 Aug 23;10:e66703. doi: 10.7554/eLife.66703 (PMC8412946; doi:10.7554/eLife.66703)
Supplement: Figure 1—source data 5. [file elife-66703-fig1-data5.xlsx]

## Sheet: Figure 1C
Figure 1 Source Data 5 pertaining to Figure 1C
Trial 1
Genotype	Relative Mir146b miRNA Expression
Young BMDM 1	1.21155
Young BMDM 2	0.923266
Young BMDM 3	1.33123
Old BMDM 1	1.69893
Old BMDM 2	0.557482
Old BMDM 3	0.533953
Trial 2
Genotype	Relative Mir146b miRNA Expression
Young BMDM 4	1.75339
Young BMDM 5	0.736949
Young BMDM 6	0.884624
Young BMDM 7	0.62504
Old BMDM 4	0.655928
Old BMDM 5	0.450075
Old BMDM 6	0.52677
Old BMDM 7	0.519093
Trial 3	Relative Mir146b miRNA Expression
Young BMDM 8	0.717808
Young BMDM 9	1.28219
Old BMDM 8	0.0688863
Old BMDM 9	0.186219
