# Supplementary material for: Loss of Mir146b with aging contributes to inflammation and mitochondrial dysfunction in thioglycollate-elicited peritoneal macrophages
Source: eLife. 2021 Aug 23;10:e66703. doi: 10.7554/eLife.66703 (PMC8412946; doi:10.7554/eLife.66703)
Supplement: Figure 1—source data 6. [file elife-66703-fig1-data6.xlsx]

## Sheet: Figure 1D
Figure 1-Source Data 6 pertaining to Figure 1D
Trial 1
Sample	Relative Mir146b miRNA
TGEM 1	1.53966
TGEM 3	0.721173
TGEM 3	0.781382
BMDM 1	0.228433
BMDM 2	0.188258
BMDM 3	0.158863
BMDM 4	0.229817
BMDM 5	0.252133
BMDM 6	0.227849
