# Supplementary material for: Loss of Mir146b with aging contributes to inflammation and mitochondrial dysfunction in thioglycollate-elicited peritoneal macrophages
Source: eLife. 2021 Aug 23;10:e66703. doi: 10.7554/eLife.66703 (PMC8412946; doi:10.7554/eLife.66703)
Supplement: Figure 1—source data 7. [file elife-66703-fig1-data7.xlsx]

## Sheet: Figure 1E
Figure 1 Source File 7 pertaining to Figure 1E
quantigene
Trial 1
Sample	Relative Mir146b normalized to u6
3 month 1	1.00845
3 month 2	0.991547
30 month 1	0.291832
30 month 2	0.487012
Trial 2
Sample	Relative Mir146b normalized to u6
3 month 3	1.00221
3 month 4	0.997793
30 month 3	0.193871
30 month 4	0.15265
Trial 3
Sample	Relative Mir146b normalized to u6
3 month 5	0.942154
3 month 6	1.05785
30 month 5	0.808357
30 month 6	0.622318
