# Supplementary material for: Loss of Mir146b with aging contributes to inflammation and mitochondrial dysfunction in thioglycollate-elicited peritoneal macrophages
Source: eLife. 2021 Aug 23;10:e66703. doi: 10.7554/eLife.66703 (PMC8412946; doi:10.7554/eLife.66703)
Supplement: Figure 2—source data 1. [file elife-66703-fig2-data1.xlsx]

## Sheet: Figure 2b
Figure 2-Source Data 1 pertaining to Fig. 2B
Trial 1
sample	Relative Mir146b miRNA
Sham 1	0.968199
Sham 2	0.989301
Sham 3	1.0425
miR-146b inhibitor 1	0.478522
miR-146b inhibitor 2	0.491581
miR-146b inhibitor 3	0.486729
Trial 2
sample	Relative Mir146b miRNA
Sham 4	1.01995
Sham 5	1.02224
Sham 6	0.957809
miR-146b inhibitor 4	0.173918
miR-146b inhibitor 5	0.176634
miR-146b inhibitor 6	0.173244
