# Supplementary material for: Loss of Mir146b with aging contributes to inflammation and mitochondrial dysfunction in thioglycollate-elicited peritoneal macrophages
Source: eLife. 2021 Aug 23;10:e66703. doi: 10.7554/eLife.66703 (PMC8412946; doi:10.7554/eLife.66703)
Supplement: Figure 2—source data 2. [file elife-66703-fig2-data2.xlsx]

## Sheet: Readme
Source Data Figure 2 C
Nos2
Mmp9
Il1b
Il6
Socs3
Cd163
Arg1
Il10

## Sheet: Nos2
Nos2
Trial 1					Trial 2						Trial 3
		Nos2 Average CT	Nos2 Average CT				Nos2 Average CT	Nos2 Average CT					Nos2 Average CT	Nos2 Average CT
		Sham Control	miR-146b Inhibitor				Sham Control	miR-146b Inhibitor					Sham Control	miR-146b Inhibitor
	Sample 1	35.0236	34.8563			Sample 1	33.6317	34.8877				Sample 1	28.5837	30.4126
	Sample 2	34.9401	34.9382			Sample 2	34.9384	34.3676				Sample 2	28.4037	30.4134
		Sham Control	miR-146b Inhibitor
	Housekeepers Average CT	22.3817	22.1542				Sham Control	miR-146b Inhibitor					Sham Control	miR-146b Inhibitor
						Housekeepers Average CT	22.8045	22.3956				Housekeepers Average CT	18.9407	19.0795
		Nos2 2^-(ΔCT)	Nos2 2^-(ΔCT)				Nos2 2^-(ΔCT)	Nos2 2^-(ΔCT)					Nos2 2^-(ΔCT)	Nos2 2^-(ΔCT)
		Sham Control	miR-146b Inhibitor				Sham Control	miR-146b Inhibitor					Sham Control	miR-146b Inhibitor
	Sample 1	0.000156465	0.000150077			Sample 1	0.000550404	0.000173587				Sample 1	0.000882744	0.000243418
	Sample 2	0.000165783	0.000141787			Sample 2	0.000222493	0.000248924				Sample 2	0.00100005	0.000243294
	Mean	0.000161124	0.000145932			Mean	0.000386448	0.000211255				Mean	0.000941397	0.000243356
	SE	4.65932e-06	4.14501e-06			SE	0.000163956	3.76684e-05				SE	5.86533e-05	6.20947e-08
		RQ	RQ				RQ	RQ					RQ	RQ
		Sham Control	miR-146b Inhibitor				Sham Control	miR-146b Inhibitor					Sham Control	miR-146b Inhibitor
		0.971082	0.931438			Sample 1	1.42426	0.449185					Sham	146b KD
	Sample 1	1.02892	0.879987			Sample 2	0.575737	0.644132				Sample 1	0.937695	0.258571
	Sample 2	1	0.905712			Mean	1	0.546658				Sample 2	1.0623	0.258439
	SE	0.0289176	0.0257256			SE	0.424263	0.0974734				Mean	1	0.258505
	SD	0.0408956	0.0363815			SD	0.599998	0.137848				SE	0.0623045	6.59602e-05
												SD	0.0881119	9.32818e-05

## Sheet: Mmp9
Mmp9
Trial 1					Trial 2						Trial 3
		Mmp9 Average CT	Mmp9 Average CT				Mmp9 Average CT	Mmp9 Average CT					Mmp9 Average CT	Mmp9 Average CT
		Sham Control	miR-146b Inhibitor				Sham Control	miR-146b Inhibitor					Sham Control	miR-146b Inhibitor
	Sample 1	26.9339	27.2231			Sample 1	27.185	28.7855				Sample 1	26.4662	28.0329
	Sample 2	26.9026	27.4116			Sample 2	27.4489	28.9578				Sample 2	26.4666	27.9378
		Sham Control	miR-146b Inhibitor
	Housekeepers Average CT	22.3817	22.1542				Sham Control	miR-146b Inhibitor					Sham Control	miR-146b Inhibitor
						Housekeepers Average CT	22.8045	22.3956				Housekeepers Average CT	18.5895	18.5172
		Mmp9 2^-(ΔCT)	Mmp9 2^-(ΔCT)				Mmp9 2^-(ΔCT)	Mmp9 2^-(ΔCT)					Mmp9 2^-(ΔCT)	Mmp9 2^-(ΔCT)
		Sham Control	miR-146b Inhibitor				Sham Control	miR-146b Inhibitor					Sham Control	miR-146b Inhibitor
	Sample 1	0.0426237	0.0297942			Sample 1	0.0480108	0.0119248				Sample 1	0.00425466	0.00136611
	Sample 2	0.0435583	0.0261441			Sample 2	0.0399847	0.0105827				Sample 2	0.0042537	0.00145922
	Mean	0.043091	0.0279692			Mean	0.0439977	0.0112537				Mean	0.00425418	0.00141266
	SE	0.000467274	0.00182504			SE	0.00401307	0.000671061				SE	4.80881e-07	4.65575e-05
		RQ	RQ				RQ	RQ					RQ	RQ
		Sham Control	miR-146b Inhibitor				Sham Control	miR-146b Inhibitor					Sham Control	miR-146b Inhibitor
		0.989156	0.691426			Sample 1	1.09121	0.271032					Sham	146b KD
	Sample 1	1.01084	0.606719			Sample 2	0.908789	0.240528				Sample 1	1.00011	0.321121
	Sample 2	1	0.649073			Mean	1	0.25578				Sample 2	0.999887	0.343009
	SE	0.0108439	0.0423532			SE	0.0912108	0.0152522				Mean	1	0.332065
	SD	0.0153356	0.0598965			SD	0.128992	0.0215698				SE	0.000113037	0.0109439
												SD	0.000159859	0.0154771

## Sheet: Il1b
Il1B
Trial 1					Trial 2						Trial 3
		Il1B Average CT	Il1B Average CT				Il1B Average CT	Il1B Average CT					Il1B Average CT	Il1B Average CT
		Sham Control	miR-146b Inhibitor				Sham Control	miR-146b Inhibitor					Sham Control	miR-146b Inhibitor
	Sample 1	30.7044	30.9154			Sample 1	31.9424	32.9434				Sample 1	31.7086	32.8197
	Sample 2	30.714	30.9624			Sample 2	32.2631	32.2782				Sample 2	31.5179	32.9777
		Sham Control	miR-146b Inhibitor
	Housekeepers Average CT	22.3817	22.1542				Sham Control	miR-146b Inhibitor					Sham Control	miR-146b Inhibitor
						Housekeepers Average CT	22.8045	22.3956				Housekeepers Average CT	18.5895	18.5172
		Il1B 2^-(ΔCT)	Il1B 2^-(ΔCT)				Il1B 2^-(ΔCT)	Il1B 2^-(ΔCT)					Il1B 2^-(ΔCT)	Il1B 2^-(ΔCT)
		Sham Control	miR-146b Inhibitor				Sham Control	miR-146b Inhibitor					Sham Control	miR-146b Inhibitor
	Sample 1	0.00312333	0.00230481			Sample 1	0.0017751	0.000668039				Sample 1	0.000112399	4.94905e-05
	Sample 2	0.00310257	0.00223093			Sample 2	0.00142127	0.00105935				Sample 2	0.00012828	4.43551e-05
	Mean	0.00311295	0.00226787			Mean	0.00159818	0.000863692				Mean	0.000120339	4.69228e-05
	SE	1.03753e-05	3.69401e-05			SE	0.000176918	0.000195653				SE	7.94046e-06	2.56768e-06
		RQ	RQ				RQ	RQ					RQ	RQ
		Sham Control	miR-146b Inhibitor				Sham Control	miR-146b Inhibitor					Sham Control	miR-146b Inhibitor
		1.00333	0.740393			Sample 1	1.1107	0.417999					Sham	146b KD
	Sample 1	0.996667	0.71666			Sample 2	0.889301	0.662843				Sample 1	0.934016	0.411257
	Sample 2	1	0.728526			Mean	1	0.540421				Sample 2	1.06598	0.368583
	SE	0.00333293	0.0118666			SE	0.110699	0.122422				Mean	1	0.38992
	SD	0.00471348	0.0167819			SD	0.156552	0.173131				SE	0.0659839	0.021337
												SD	0.0933153	0.0301751

## Sheet: Figure 2C
Figure 2C
qPCR
Trial 1
		Nos2	Il1B	Il6	Ccl2	Mmp9	Il10	Arg1	Cd163
	Sham Control Target Ct Mean	34.9819	30.7092	30.5223	25.9036	26.9183	31.8516	21.9353	31.2591
	Sham Control Houskeepers Geometric Mean	20.6229	20.6229	20.6229	20.6229	20.6229	20.6229	20.6229	20.6229
	Mir146b Inhibitor Target Ct Mean	34.8972	20.3103	20.3103	25.681	27.3173	32.4957	21.7494	31.8976
	Mir146b Houskeepers Geometric Mean	20.3103	30.9389	31.2382	20.3103	20.3103	20.3103	20.3103	20.3103
	Mir146b Inhibitor expression relative to sham control	0.853871	0.686827	0.500078	0.938873	0.611921	0.513411	0.916082	0.506799
Trial 2	Sham Control Target Ct Mean	34.2851	32.1027	32.9086	25.9536	27.3169	32.5585	21.942	33.3115
	Sham Control Houskeepers Geometric Mean	20.9954	20.9954	20.9954	20.9954	20.9954	20.9954	20.9954	20.9954
	Mir146b Inhibitor Target Ct Mean	34.6276	32.6108	32.8182	25.812	28.8716	31.5926	22.8121	34.2149
	Mir146b Inhibitor Houskeepers Geometric Mean	20.6906	20.6906	20.6906	20.6906	20.6906	20.6906	20.6906	20.6906
	Mir146b Inhibitor expression relative to sham control	0.587533	0.580829	0.79148	0.899009	0.274905	1.58169	0.445451	0.431913
Trial 3	Sham Control Target Ct Mean	28.4937	31.6132	30.2212	30.246	26.4664	30.234	19.5005	not tested
	Sham Control Houskeepers Geometric Mean	18.9407	18.5895	18.438	18.438	18.5895	18.438	18.9407
	Mir146b Inhibitor Target Ct Mean	30.413	32.8987	30.9239	30.491	27.9853	29.8135	20.5837
	Mir146b Inhibitor Houskeepers Geometric Mean	19.0795	18.5172	18.4083	18.4083	18.5172	18.4083	19.0795
	Mir146b Inhibitor expression relative to sham control	0.258505	0.38992	0.600599	0.826603	0.332065	1.31096	0.519807
Average relative gene expression in miR146b KD vs. sham control		0.566636	0.552525	0.630719	0.888162	0.406297	1.13535	0.627113	0.469356
SE		0.172185	0.0868701	0.085458	0.0328602	0.104128	0.320642	0.14607	0.0374431
