# Supplementary material for: Loss of Mir146b with aging contributes to inflammation and mitochondrial dysfunction in thioglycollate-elicited peritoneal macrophages
Source: eLife. 2021 Aug 23;10:e66703. doi: 10.7554/eLife.66703 (PMC8412946; doi:10.7554/eLife.66703)
Supplement: Figure 2—source data 3. [file elife-66703-fig2-data3.xlsx]

## Sheet: Figure 2D
Figure 2-Source Data 3 pertaining to Figure 2D
	Cntl 1	Cntl 2	Cntl 3	Cntl 4	Cntl 5	Cntl 6	cKO 1	cKO 2	cKO3	cKO5	cKO 5	cKO 6
Mir146b CT Average	26.1599	26.008	26.1409	26.5515	26.65	26.6518	31.0432	31.6382	30.8437	30.3392	31.3919	30.694
Housekeepers CT Geometric Mean	16.1598	16.2617	16.8807	16.9073	16.4543	16.5287	16.7311	17.0682	17.3007	16.8414	17.1334	16.4601
ΔCT Average	10.0001	9.74635	9.26026	9.64415	10.1957	10.1232	14.3121	14.5701	13.543	13.4977	14.2585	14.2339
2^-(ΔCT) Average	0.000976746	0.00116467	0.00163177	0.00124985	0.000853503	0.000904184	4.92755e-05	4.11383e-05	8.39843e-05	8.65236e-05	5.12235e-05	5.24211e-05
SE	2.29104e-05	3.02621e-05	5.82209e-05	1.6043e-05	3.78255e-05	0.000116474	3.32299e-06	1.4462e-06	5.85052e-06	3.52808e-06	4.51806e-06	7.37372e-06
RQ Mean	0.864284	1.03057	1.44389	1.10594	0.755231	0.800077	0.0436019	0.0364017	0.0743144	0.0765614	0.0453256	0.0463854
RQ SEM	0.0202726	0.0267778	0.0515174	0.0141959	0.0334703	0.103063	0.00294038	0.00127969	0.0051769	0.00312186	0.00399786	0.00652472
RQ SD	0.0286697	0.0378695	0.0728566	0.020076	0.0473341	0.145753	0.00415833	0.00180975	0.00732124	0.00441498	0.00565383	0.00922734
Cntl RQ AVE	1
Cntl RQ SE	0.104483
Cntl RQ SD	0.25593
cKO RQ AVE	0.0537651
cKO RQ SE	0.00700573
cKO RQ SD	0.0171605
