# Supplementary material for: Loss of Mir146b with aging contributes to inflammation and mitochondrial dysfunction in thioglycollate-elicited peritoneal macrophages
Source: eLife. 2021 Aug 23;10:e66703. doi: 10.7554/eLife.66703 (PMC8412946; doi:10.7554/eLife.66703)
Supplement: Figure 2—source data 4. [file elife-66703-fig2-data4.xlsx]

## Sheet: Figure 2E
Figure 2-Source Data 4 pertaining to Figure 2E
	Cntl 1	Cntl 2	Cntl 3	Cntl 4	Cntl 5	Cntl 6	cKO 1	cKO 2	cKO3	cKO5	cKO 5	cKO 6
Mir146a CT Average	26.2436	26.4569	26.0436	26.4168	26.8887	27.2669	26.9408	26.4339	26.1503	26.4953	26.6311	27.5076
Housekeepers CT Geometric Mean	16.1598	16.2617	16.8807	16.9073	16.4543	16.5287	16.7311	17.0682	17.3007	16.8414	17.1334	16.4601
ΔCT Average	10.0838	10.1952	9.16294	9.50947	10.4344	10.7383	10.2097	9.36574	8.84957	9.65388	9.49767	11.0474
2^-(ΔCT) Average	0.000922941	0.000861203	0.00174655	0.00137691	0.000723412	0.000585477	0.000844473	0.00151642	0.00216858	0.00125375	0.00138579	0.000472681
SE	5.2665e-05	0.000118884	8.38826e-05	0.000115793	3.35586e-05	8.88921e-06	3.7535e-06	4.48178e-05	5.90934e-05	0.00017597	8.3051e-05	1.36669e-05
RQ Mean	0.890799	0.831211	1.68572	1.32896	0.698219	0.565088	0.815064	1.46361	2.09306	1.21009	1.33753	0.45622
RQ SEM	0.0508309	0.114744	0.0809614	0.111761	0.0323899	0.00857964	0.00362278	0.043257	0.0570354	0.169842	0.0801588	0.013191
RQ SD	0.0718857	0.162273	0.114497	0.158053	0.0458062	0.0121334	0.00512339	0.0611747	0.0806602	0.240193	0.113362	0.0186548
Cntl RQ AVE	1
Cntl RQ SE	0.173115
Cntl RQ SD	0.424044
cKO RQ AVE	1.22926
cKO RQ SE	0.22966
cKO RQ SD	0.56255
