# Supplementary material for: Loss of Mir146b with aging contributes to inflammation and mitochondrial dysfunction in thioglycollate-elicited peritoneal macrophages
Source: eLife. 2021 Aug 23;10:e66703. doi: 10.7554/eLife.66703 (PMC8412946; doi:10.7554/eLife.66703)
Supplement: Figure 2—source data 5. [file elife-66703-fig2-data5.xlsx]

## Sheet: Readme
Source Data Figure 2 C
Nos2
Mmp9
Il1b
Il6
Socs3
Cd163
Arg1
Il10

## Sheet: Nos2
Nos2
Trial 1					Trial 2						Trial 3
		Nos2 Average CT	Nos2 Average CT				Nos2 Average CT	Nos2 Average CT					Nos2 Average CT	Nos2 Average CT
		Sham Control	miR-146b Inhibitor				Sham Control	miR-146b Inhibitor					Sham Control	miR-146b Inhibitor
	Sample 1	35.0236	34.8563			Sample 1	33.6317	34.8877				Sample 1	28.5837	30.4126
	Sample 2	34.9401	34.9382			Sample 2	34.9384	34.3676				Sample 2	28.4037	30.4134
		Sham Control	miR-146b Inhibitor
	Housekeepers Average CT	22.3817	22.1542				Sham Control	miR-146b Inhibitor					Sham Control	miR-146b Inhibitor
						Housekeepers Average CT	22.8045	22.3956				Housekeepers Average CT	18.9407	19.0795
		Nos2 2^-(ΔCT)	Nos2 2^-(ΔCT)				Nos2 2^-(ΔCT)	Nos2 2^-(ΔCT)					Nos2 2^-(ΔCT)	Nos2 2^-(ΔCT)
		Sham Control	miR-146b Inhibitor				Sham Control	miR-146b Inhibitor					Sham Control	miR-146b Inhibitor
	Sample 1	0.000156465	0.000150077			Sample 1	0.000550404	0.000173587				Sample 1	0.000882744	0.000243418
	Sample 2	0.000165783	0.000141787			Sample 2	0.000222493	0.000248924				Sample 2	0.00100005	0.000243294
	Mean	0.000161124	0.000145932			Mean	0.000386448	0.000211255				Mean	0.000941397	0.000243356
	SE	4.65932e-06	4.14501e-06			SE	0.000163956	3.76684e-05				SE	5.86533e-05	6.20947e-08
		RQ	RQ				RQ	RQ					RQ	RQ
		Sham Control	miR-146b Inhibitor				Sham Control	miR-146b Inhibitor					Sham Control	miR-146b Inhibitor
		0.971082	0.931438			Sample 1	1.42426	0.449185					Sham	146b KD
	Sample 1	1.02892	0.879987			Sample 2	0.575737	0.644132				Sample 1	0.937695	0.258571
	Sample 2	1	0.905712			Mean	1	0.546658				Sample 2	1.0623	0.258439
	SE	0.0289176	0.0257256			SE	0.424263	0.0974734				Mean	1	0.258505
	SD	0.0408956	0.0363815			SD	0.599998	0.137848				SE	0.0623045	6.59602e-05
												SD	0.0881119	9.32818e-05

## Sheet: Mmp9
Mmp9
Trial 1					Trial 2						Trial 3
		Mmp9 Average CT	Mmp9 Average CT				Mmp9 Average CT	Mmp9 Average CT					Mmp9 Average CT	Mmp9 Average CT
		Sham Control	miR-146b Inhibitor				Sham Control	miR-146b Inhibitor					Sham Control	miR-146b Inhibitor
	Sample 1	26.9339	27.2231			Sample 1	27.185	28.7855				Sample 1	26.4662	28.0329
	Sample 2	26.9026	27.4116			Sample 2	27.4489	28.9578				Sample 2	26.4666	27.9378
		Sham Control	miR-146b Inhibitor
	Housekeepers Average CT	22.3817	22.1542				Sham Control	miR-146b Inhibitor					Sham Control	miR-146b Inhibitor
						Housekeepers Average CT	22.8045	22.3956				Housekeepers Average CT	18.5895	18.5172
		Mmp9 2^-(ΔCT)	Mmp9 2^-(ΔCT)				Mmp9 2^-(ΔCT)	Mmp9 2^-(ΔCT)					Mmp9 2^-(ΔCT)	Mmp9 2^-(ΔCT)
		Sham Control	miR-146b Inhibitor				Sham Control	miR-146b Inhibitor					Sham Control	miR-146b Inhibitor
	Sample 1	0.0426237	0.0297942			Sample 1	0.0480108	0.0119248				Sample 1	0.00425466	0.00136611
	Sample 2	0.0435583	0.0261441			Sample 2	0.0399847	0.0105827				Sample 2	0.0042537	0.00145922
	Mean	0.043091	0.0279692			Mean	0.0439977	0.0112537				Mean	0.00425418	0.00141266
	SE	0.000467274	0.00182504			SE	0.00401307	0.000671061				SE	4.80881e-07	4.65575e-05
		RQ	RQ				RQ	RQ					RQ	RQ
		Sham Control	miR-146b Inhibitor				Sham Control	miR-146b Inhibitor					Sham Control	miR-146b Inhibitor
		0.989156	0.691426			Sample 1	1.09121	0.271032					Sham	146b KD
	Sample 1	1.01084	0.606719			Sample 2	0.908789	0.240528				Sample 1	1.00011	0.321121
	Sample 2	1	0.649073			Mean	1	0.25578				Sample 2	0.999887	0.343009
	SE	0.0108439	0.0423532			SE	0.0912108	0.0152522				Mean	1	0.332065
	SD	0.0153356	0.0598965			SD	0.128992	0.0215698				SE	0.000113037	0.0109439
												SD	0.000159859	0.0154771

## Sheet: Il1b
Il1B
Trial 1					Trial 2						Trial 3
		Il1B Average CT	Il1B Average CT				Il1B Average CT	Il1B Average CT					Il1B Average CT	Il1B Average CT
		Sham Control	miR-146b Inhibitor				Sham Control	miR-146b Inhibitor					Sham Control	miR-146b Inhibitor
	Sample 1	30.7044	30.9154			Sample 1	31.9424	32.9434				Sample 1	31.7086	32.8197
	Sample 2	30.714	30.9624			Sample 2	32.2631	32.2782				Sample 2	31.5179	32.9777
		Sham Control	miR-146b Inhibitor
	Housekeepers Average CT	22.3817	22.1542				Sham Control	miR-146b Inhibitor					Sham Control	miR-146b Inhibitor
						Housekeepers Average CT	22.8045	22.3956				Housekeepers Average CT	18.5895	18.5172
		Il1B 2^-(ΔCT)	Il1B 2^-(ΔCT)				Il1B 2^-(ΔCT)	Il1B 2^-(ΔCT)					Il1B 2^-(ΔCT)	Il1B 2^-(ΔCT)
		Sham Control	miR-146b Inhibitor				Sham Control	miR-146b Inhibitor					Sham Control	miR-146b Inhibitor
	Sample 1	0.00312333	0.00230481			Sample 1	0.0017751	0.000668039				Sample 1	0.000112399	4.94905e-05
	Sample 2	0.00310257	0.00223093			Sample 2	0.00142127	0.00105935				Sample 2	0.00012828	4.43551e-05
	Mean	0.00311295	0.00226787			Mean	0.00159818	0.000863692				Mean	0.000120339	4.69228e-05
	SE	1.03753e-05	3.69401e-05			SE	0.000176918	0.000195653				SE	7.94046e-06	2.56768e-06
		RQ	RQ				RQ	RQ					RQ	RQ
		Sham Control	miR-146b Inhibitor				Sham Control	miR-146b Inhibitor					Sham Control	miR-146b Inhibitor
		1.00333	0.740393			Sample 1	1.1107	0.417999					Sham	146b KD
	Sample 1	0.996667	0.71666			Sample 2	0.889301	0.662843				Sample 1	0.934016	0.411257
	Sample 2	1	0.728526			Mean	1	0.540421				Sample 2	1.06598	0.368583
	SE	0.00333293	0.0118666			SE	0.110699	0.122422				Mean	1	0.38992
	SD	0.00471348	0.0167819			SD	0.156552	0.173131				SE	0.0659839	0.021337
												SD	0.0933153	0.0301751

## Sheet: Figure 2F
Figure 2 Source Data 5 pertaining to Figure 2F
qPCR
Trial 1
	Actinb	Gapdh	Housekeeper GeoMean	Nos2	Il1B	Il6	Ccl2	Mmp9	Il10	Arg1	Cd163
Cntl 1 Ct	16.815	18.5232	17.6485	31.7659	31.6642	30.6236	26.2128	27.0049	30.5137	26.1335	32.4839
Cntl 2 Ct	16.4885	18.9666	17.6842	33.9041	31.6204	31.0458	26.3567	27.0268	30.8524	26.4639	31.8114
Cntl 3 Ct	16.3244	19.2179	17.7122	31.7464	29.2454	30.5803	25.8972	26.8578	30.4037	26.3241	31.3585
cKO 1 Ct	16.3561	18.7906	17.5311	34.48	31.8519	31.5097	26.2676	27.0365	30.0316	25.2183	31.7868
cKO 2 Ct	16.3149	18.9274	17.5726	34.7933	31.647	30.2954	26.0041	26.4675	30.204	25.7749	31.1441
mRNA expression in cKO relative to Cntl				0.168089	0.347183	0.891993	0.921782	1.07939	1.25761	1.62302	1.18934
Trial 2
	Actinb	Gapdh	Housekeeper GeoMean	Nos2	Il1B	Il6	Ccl2	Mmp9	Il10	Arg1	Cd163
Cntl Ct	17.7709	20.3323	19.0085	34.0006	29.4309	32.4899	27.8148	27.6105	31.8335	23.9376	32.5862
cKO Ct	16.3243	18.7056	17.4744	34.7994	29.5279	30.8403	26.2433	25.8885	30.436	23.7092	31.8551
mRNA expression in cKO relative to Cntl				0.19849	0.372722	0.499832	0.800842	1.34274	0.500569	0.666609	0.573164
Trial 3
	Actinb	Gapdh	Housekeeper GeoMean	Nos2	Il1B	Il6	Ccl2	Mmp9	Il10	Arg1	Cd163
Cntl Ct	17.6718	20.2801	18.9311	32.5477	30.2598	31.8774	27.433	27.3787	30.7233	22.1816	34.4374
cKO 1 Ct	18.5361	21.0093	19.734	34.3772	30.5728	32.3989	27.6238	27.782	31.7949	23.1873	34.5952
cKO 2 Ct	17.9975	20.8759	19.3834	32.8824	30.1828	31.8957	27.7643	27.6386	32.1786	22.4627	34.5885
mRNA expression in cKO relative to Cntl				0.787921	1.42382	1.28317	1.308	1.23093	0.66456	0.997417	1.39807
Trial 4
	Actinb	Gapdh	Housekeeper GeoMean	Nos2	Il1B	Il6	Ccl2	Mmp9	Il10	Arg1	Cd163
Cntl Ct	16.8025	18.7365	17.7432	31.05	24.82	26.9925	23.1585	25.736	31.8185	18.648	29.603
cKO Ct	16.735	18.8805	17.7754	31.4045	24.583	27.389	24.3535	25.171	31.487	19.4705	29.191
mRNA expression in cKO relative to Cntl				0.809313	1.20524	0.777279	0.446675	1.51329	1.27882	0.578647	1.36086
Trial 5
	Actinb	Gapdh	Housekeeper GeoMean	Nos2	Il1B	Il6	Ccl2	Mmp9	Il10	Arg1	Cd163
Cntl Ct	16.8815	18.9072	17.8656	31.8155	30.0907	34.4823	26.9286	26.4395	33.7971	24.897	31.5163
cKO Ct	16.5707	18.7895	17.6452	35.7491	30.8844	34.8958	27.1552	25.9452	32.3892	24.79	31.9693
mRNA expression in cKO relative to Cntl				0.056421	0.493739	0.643692	0.733338	1.20774	2.27834	0.923187	0.625667
Average mRNA expression in cKO for all trials				0.404047	0.768541	0.819194	0.842128	1.27482	1.19598	0.957776	1.02942
