# Supplementary material for: Loss of Mir146b with aging contributes to inflammation and mitochondrial dysfunction in thioglycollate-elicited peritoneal macrophages
Source: eLife. 2021 Aug 23;10:e66703. doi: 10.7554/eLife.66703 (PMC8412946; doi:10.7554/eLife.66703)
Supplement: Figure 3—source data 3. [file elife-66703-fig3-data3.xlsx]

## Sheet: Fig. 3C
Figure 3-Source Data 3 pertaining to Fig. 3C
# of mitochondria per cell, EM pictures
Cntl	cKO
36	11
33	15
26	23
33	12
16	17
13	8
12	27
32	10
25	33
53	16
21
28
