# Supplementary material for: Loss of Mir146b with aging contributes to inflammation and mitochondrial dysfunction in thioglycollate-elicited peritoneal macrophages
Source: eLife. 2021 Aug 23;10:e66703. doi: 10.7554/eLife.66703 (PMC8412946; doi:10.7554/eLife.66703)
Supplement: Figure 3—source data 6. [file elife-66703-fig3-data6.xlsx]

## Sheet: Sheet1
Figure 4-Source Data 6 pertaining to Fig. 3F
IMAGE
APT16_004WT	measure 1	measure 2	measure 3	ave per space
	17.019	17.019	8.85	14.296
	12.934	11.573	8.85	11.119
	11.573	15.657	8.85	12.0267
	13.615	11.573	12.934	12.7073
	7.488	7.488	6.808	7.26133
	8.85	10.211	8.85	9.30367
				11.119
APT16_011_WT	15.561	8.379	17.956	13.9653
	21.547	15.561	16.759	17.9557
	17.956	29.926	10.773	19.5517
	14.364	15.561	19.153	16.3593
	16.759	22.744	16.759	18.754
	11.97	13.167	15.561	13.566
	14.364	14.364	16.759	15.1623
				16.4735
APT16_015_WT	12.015	10.68	7.342	10.0123
	9.345	6.007	10.01	8.454
	6.007	12.01	12	10.0057
	9.345	6.007	6.007	7.11967
	11.347	8.01	11.347	10.2347
	6.675	8.677	6.675	7.34233
	9.345	9.345	11.347	10.0123
	9.345	8.677	14.017	10.6797
	7.342	14.017	8.677	10.012
	8.01	10.012	9.345	9.12233
				9.2995
APT16_018_WT	7.439	10.821	11.497	9.919
	8.792	6.087	12.85	9.243
	8.792	11.497	11.497	10.5953
	14.878	9.468	12.85	12.3987
	9.468	9.468	10.821	9.919
	9.468	11.497	10.144	10.3697
				10.4074
APT16_019_WT	8.792	8.115	10.144	9.017
	10.821	9.468	6.763	9.01733
	8.115	10.821	11.497	10.1443
	8.792	9.468	12.85	10.37
	9.468	8.115	8.792	8.79167
	10.821	12.173	12.85	11.948
	8.115	6.087	6.087	6.763
	9.468	8.115	6.087	7.89
	8.115	9.468	8.115	8.566
				9.16748
APT16_020_WT	7.439	10.144	11.497	9.69333
	8.792	7.439	9.468	8.56633
	8.115	10.821	8.792	9.24267
	7.439	6.763	9.468	7.89
	7.439	5.41	8.115	6.988
	8.115	8.115	6.087	7.439
	11.497	7.439	7.439	8.79167
	10.821	12.85	8.115	10.5953
	6.763	6.087	12.85	8.56667
	10.821	8.792	10.144	9.919
	10.821	10.821	11.497	11.0463
	7.439	8.115	7.439	7.66433
	9.468	11.497	10.821	10.5953
	5.41	6.087	6.087	5.86133
	8.115	9.468	6.763	8.11533
	8.792	8.115	11.497	9.468
	10.821	11.497	10.144	10.8207
	11.497	8.115	9.468	9.69333
	9.468	10.144	11.497	10.3697
				9.01718
APT16_021_WT	8.792	7.439	10.144	8.79167
	6.763	9.468	8.115	8.11533
	10.144	7.439	7.439	8.34067
	8.792	7.439	11.497	9.24267
	14.202	6.763	9.468	10.1443
	5.41	9.468	11.497	8.79167
	7.439	5.41	8.115	6.988
				8.63062
APT16_022_WT	8.85	8.85	14.976	10.892
	10.211	7.488	4.765	7.488
	7.488	8.85	10.892	9.07667
	10.211	8.85	10.211	9.75733
	10.892	8.85	6.807	8.84967
	10.211	8.169	14.296	10.892
				9.49261
APT16_022_WT	10.68	10.68	12.014	11.1247
	11.347	10.012	7.342	9.567
	14.684	10.012	10.012	11.5693
				10.7537
APT16_036_cko	30.036	28.701	18.022	25.5863
	10.68	11.347	14.014	12.0137
	12.682	13.349	10.012	12.0143
	11.347	12.014	19.357	14.2393
	10.68	10.68	11.347	10.9023
	9.345	12.014	12.014	11.1243
	14.017	22.027	11.347	15.797
	16.019	14.684	14.684	15.129
				14.6008
APT16_037_cko	12.682	12.682	10.012	11.792
	9.345	6.675	4.672	6.89733
	12.682	10.012	8.677	10.457
	12.682	12.682	12.014	12.4593
	9.345	5.34	9.345	8.01
	10.012	7.342	7.342	8.232
	10.68	10.68	9.345	10.235
	12.682	12.014	8.677	11.1243
	14.684	12.014	10.012	12.2367
	9.345	8.677	9.345	9.12233
	12.682	13.349	12.014	12.6817
	11.347	12.014	10.012	11.1243
	14.017	14.684	20.692	16.4643
	11.347	8.677	8.01	9.34467
	11.347	7.342	4.672	7.787
				10.5312
APT16_038_cko	9.345	7.342	7.342	8.00967
	8.01	10.68	6.675	8.455
	9.345	12.014	22.694	14.6843
	13.349	15.352	14.017	14.2393
	12.014	15.352	16.687	14.6843
	14.017	14.684	4.672	11.1243
	7.342	8.677	6.007	7.342
	15.352	10.012	11.347	12.237
	9.345	8.677	8.677	8.89967
	10.68	9.345	6.007	8.67733
	13.349	10.012	10.68	11.347
				10.8818
APT16_039_cko	21.359	17.354	13.349	17.354
	8.01	12.682	10.012	10.2347
	18.022	16.019	20.024	18.0217
	10.68	12.682	16.019	13.127
	15.352	14.017	12.682	14.017
	14.684	13.349	20.692	16.2417
	17.354	10.012	12.682	13.3493
	9.345	7.342	7.342	8.00967
	8.677	9.345	14.684	10.902
	12.014	7.342	13.349	10.9017
	12.682	11.347	14.017	12.682
	14.017	12.682	14.017	13.572
	12.682	7.342	12.682	10.902
	8.677	9.345	15.352	11.1247
	13.349	11.347	10.012	11.5693
	9.345	11.347	12.682	11.1247
				12.6958
APT16_040_cko	11.347	14.017	7.342	10.902
	14.017	14.017	14.684	14.2393
	16.019	16.019	16.687	16.2417
	12.682	13.349	15.352	13.7943
	20.024	24.029	15.352	19.8017
	16.687	14.684	14.017	15.1293
	8.677	7.342	5.34	7.11967
	14.017	10.012	7.342	10.457
	12.014	16.019	16.687	14.9067
	11.347	6.077	12.682	10.0353
	11.347	11.347	7.342	10.012
	11.347	15.352	11.347	12.682
	12.682	9.345		11.0135
	11.347	10.68	9.345	10.4573
	12.682	11.347	13.349	12.4593
	8.677	10.012	15.352	11.347
	8.677	7.342	6.675	7.56467
	14.684	11.347	11.347	12.4593
	8.01	11.347	8.677	9.34467
	16.687	14.017	12.682	14.462
	15.352	14.017	16.687	15.352
	14.017	20.692	14.017	16.242
				12.5465
APT16_041_cko	13.349	8.677	11.347	11.1243
	9.345	13.349	16.687	13.127
	26.699	14.684	20.024	20.469
	14.684	13.349	10.012	12.6817
	12.682	11.347	11.347	11.792
	10.68	13.349	14.017	12.682
	20.024	21.359	19.35	20.2443
	16.687	16.019	16.019	16.2417
	11.347	10.68	16.687	12.9047
	16.019	20.692	37.378	24.6963
	12.014	16.019	14.017	14.0167
	16.019	8.677	13.349	12.6817
	14.684	19.357	16.019	16.6867
	14.684	18.022	17.354	16.6867
	14.017	11.347	14.684	13.3493
	12.014	16.687	14.017	14.2393
				15.2265
APT16_042_cko	19.357	19.37	15.352	18.0263
	14.017	10.012	14.684	12.9043
	15.352	14.017	8.677	12.682
	20.024	18.689	16.019	18.244
	16.019	12.014	27.366	18.4663
	16.687	12.682	12.014	13.7943
	12.682	12.682	10.012	11.792
	12.682	24.696	29.369	22.249
	12.014	12.014	13.349	12.459
	14.684	17.354	11.347	14.4617
	13.349	22.027	20.692	18.6893
	16.687	16.687	9.345	14.2397
				15.6673
APT16_043_cko	16.687	15.352	22.694	18.2443
	20.692	18.689	16.019	18.4667
	12.014	21.359	22.694	18.689
	12.014	18.022	8.01	12.682
	8.01	14.017	13.349	11.792
	23.361	12.682	10.012	15.3517
	12.682	17.354	12.014	14.0167
				15.606
APT16_044_cko	18.022	16.687	14.017	16.242
	9.345	14.017	16.019	13.127
	14.017	12.682	12.014	12.9043
	11.347	12.682	5.34	9.78967
	10.68	8.677	6.007	8.45467
	10.012	10.012	14.017	11.347
	14.017	9.345	8.01	10.4573
	11.347	10.012	10.68	10.6797
	10.012	9.345	16.019	11.792
	18.022	15.352	14.684	16.0193
	14.017	16.68	11.347	14.0147
	10.68	13.349	11.347	11.792
	13.349	12.682	9.345	11.792
	9.345	9.345	6.007	8.23233
	13.349	16.019	7.342	12.2367
	20.692	23.361	16.019	20.024
	13.349	10.68	11.347	11.792
	16.019	13.349	16.019	15.129
	9.345	12.014	8.01	9.78967
	12.682	9.345	8.677	10.2347
	10.68	11.347	8.677	10.2347
				12.1945
APT16_045_cko	12.014	11.347	14.684	12.6817
	6.007	10.012	7.342	7.787
	12.682	8.01	9.345	10.0123
	14.017	18.689	14.684	15.7967
	8.677	10.68	11.347	10.2347
	11.347	7.342	8.677	9.122
	10.012	12.014	6.675	9.567
	7.342	5.34	12.682	8.45467
				10.457
