# Supplementary material for: Loss of Mir146b with aging contributes to inflammation and mitochondrial dysfunction in thioglycollate-elicited peritoneal macrophages
Source: eLife. 2021 Aug 23;10:e66703. doi: 10.7554/eLife.66703 (PMC8412946; doi:10.7554/eLife.66703)
Supplement: Figure 3—source data 7. [file elife-66703-fig3-data7.xlsx]

## Sheet: Figure 3G
Figure 3-Source Data 7 pertaining to Fig. 3G
Sample	Average Raw Absorbance at 590nM, 22.8°C	reading minus background Absorbance (590nM)		CNTL Average	CKO Average	CNTL SE	CKO SE
Background Average	0.135
CNTL 1	0.4989	0.3639
CNTL 2	0.4985	0.3635
CNTL 3	0.466	0.331
CNTL 4	0.4571	0.3221
CNTL 5	0.4634	0.3284
CNTL 6	0.5006	0.3656
CNTL 7	0.4572	0.3222		0.342386	0.2774	0.00785552	0.00834666
CKO1	0.4302	0.2952
CKO2	0.43	0.295
CKO3	0.4232	0.2882
CKO4	0.3884	0.2534
CKO5	0.3902	0.2552
CKO6	0.3888	0.2538
CKO7	0.436	0.301
