# Supplementary material for: Loss of Mir146b with aging contributes to inflammation and mitochondrial dysfunction in thioglycollate-elicited peritoneal macrophages
Source: eLife. 2021 Aug 23;10:e66703. doi: 10.7554/eLife.66703 (PMC8412946; doi:10.7554/eLife.66703)
Supplement: Figure 3—source data 8. [file elife-66703-fig3-data8.xlsx]

## Sheet: Figure 3H
Figure 3-Source Data 8 as pertains to Figure 3H
Seahorse OCR
Time	Control				cKO
0	154.524	136.482	164.843		132	110	150	128
8.42	147.299	130.256	156.971		127.983	105.157	143.297	123.317
17.24	147.013	129.525	156.594		128.282	104.252	142.862	123.192
26.19	50.0371	44.2286	57.8474		29	39	44	47
35	55.73	49.6131	61.5078		54	42.0173	36.6136	52.106
43.4	53.8821	47.239	58.7377		51.8969	40.6855	49.3457	50.616
52.36	270.32	215.165	283.918		197.443	181.776	187.818	216.255
61.16	236.572	182.903	259.372		169.912	151.655	166.582	198.968
69.57	239.892	185.612	261.409		172.568	147.191	170.641	195.575
78.53	40.8541	33.593	44.6155		39.5786	33.4466	46.376	42.9642
87.33	44.1941	37.3802	49.0608		41.9246	35.381	50.9615	43.945
96.15	42.5989	36.099	47.4641		40.7151	34.321	48.9368	43.0763
