# Supplementary material for: Loss of Mir146b with aging contributes to inflammation and mitochondrial dysfunction in thioglycollate-elicited peritoneal macrophages
Source: eLife. 2021 Aug 23;10:e66703. doi: 10.7554/eLife.66703 (PMC8412946; doi:10.7554/eLife.66703)
Supplement: Figure 3—source data 9. [file elife-66703-fig3-data9.xlsx]

## Sheet: Figure 3I
Time	Control				cKO
0	23	19	21		14	14	19	15
8.42	26.4241	21.2533	30.4694		20.5487	16.2192	20.6305	16.4759
17.24	27.6726	21.8686	32.0289		21.6457	17.2939	21.2964	17.4532
26.19	46.3393	30.1271	49.9778		32.1827	23.9897	27.262	29.766
35	43.1035	30.5258	51.7981		29.3464	26.7861	27	26.6563
43.4	58.6549	37.2323	63.603		39.5089	33.7614	29.807	37.7368
52.36	89.8015	66.3624	92.3117		62.7372	54.3847	64.4767	62.1193
61.16	84.0689	61.1744	84.8654		58.4498	52.1486	58.446	60.7355
69.57	85.9877	63.4421	85.3528		61.1512	54.2892	61.6913	63.9933
78.53	81.0704	56.6083	84.3614		57.7279	49.6871	51.1373	52.89
87.33	83.7734	61.4385	84.8204		59.4115	51.4295	57.1228	55.8562
96.15	84.5718	63.4524	84.7471		59.8264	52.1974	60.6221	57.8437
