# Supplementary material for: Loss of Mir146b with aging contributes to inflammation and mitochondrial dysfunction in thioglycollate-elicited peritoneal macrophages
Source: eLife. 2021 Aug 23;10:e66703. doi: 10.7554/eLife.66703 (PMC8412946; doi:10.7554/eLife.66703)
Supplement: Figure 3—source data 10. [file elife-66703-fig3-data10.xlsx]

## Sheet: Figure 3J
Figure 3 Source Data 10 pertaining to Fig. 3J
Meaurement/Time	Control								Mir146b mimic
0	18	16	19	23	20	16			25	29	22	21	22	20	20	26
8.42	17	15	16	20	17	15			24	26	23	20	20	18	20	24
16.84	18	16	17	22	18	14			25	27	24	22	21	20	21	27
25.26	23	20	22	28	24	21			32	34	31	32	32	30	29	36
33.68	39	35	35	43	39	33			50	55	47	51	52	49	46	51
42.1	48	45	45	53	48	42			60	68	57	62	64	61	57	64
50.52	58	56	59	69	64	52			73	91	75	81	83	77	74	76
58.94	59	58	59	68	63	54			72	89	74	79	82	77	74	78
67.36	62	60	62	70	64	56			74	88	75	79	82	78	74	81
75.78	48	49	48	56	52	44			66	72	61	65	67	62	65	65
84.2	49	48	49	55	51	44			64	72	61	65	67	62	63	65
96.62	49	47	49	54	47	43			61	73	61	65	66	62	61	64
