# Supplementary material for: Loss of Mir146b with aging contributes to inflammation and mitochondrial dysfunction in thioglycollate-elicited peritoneal macrophages
Source: eLife. 2021 Aug 23;10:e66703. doi: 10.7554/eLife.66703 (PMC8412946; doi:10.7554/eLife.66703)
Supplement: Figure 3—source data 11. [file elife-66703-fig3-data11.xlsx]

## Sheet: Figure 3K
Figure 3-Source Data 11 as pertains to Fig. 3K
Time	Control						Mir146b mimic
0	18	16	19	23	20	16	29	22	21	22	20	20	26
8.42	17	15	16	20	17	15	26	23	20	20	18	20	24
17.24	18	16	17	22	18	14	27	24	22	21	20	21	27
26.19	23	20	22	28	24	21	34	31	32	32	30	29	36
35	39	35	35	43	39	33	55	47	51	52	49	46	51
43.4	48	45	45	53	48	42	68	57	62	64	61	57	64
52.36	58	56	59	69	64	52	91	75	81	83	77	74	76
61.16	59	58	59	68	63	54	89	74	79	82	77	74	78
69.57	62	60	62	70	64	56	88	75	79	82	78	74	81
78.53	48	49	48	56	52	44	72	61	65	67	62	65	65
87.33	49	48	49	55	51	44	72	61	65	67	62	63	65
96.15	49	47	49	54	47	43	73	61	65	66	62	61	64
