# Supplementary material for: Loss of Mir146b with aging contributes to inflammation and mitochondrial dysfunction in thioglycollate-elicited peritoneal macrophages
Source: eLife. 2021 Aug 23;10:e66703. doi: 10.7554/eLife.66703 (PMC8412946; doi:10.7554/eLife.66703)
Supplement: Figure 4—source data 1. [file elife-66703-fig4-data1.xlsx]

## Sheet: Figure 4A
ID	Symbol	BaseMean	log2FC	lfcSE	stat	pval	padj
ENSMUSG00000069515	Lyz1	820.55	2.1467	0.19036	11.274	1.7661e-29	1.0009e-25
ENSMUSG00000035403	Crb2	18.969	-1.0387	0.26102	-3.979	6.9193e-05	0.0057248
ENSMUSG00000028128	F3	21.689	-1.0714	0.26114	-4.1579	3.2112e-05	0.0032211
ENSMUSG00000060923	Acyp2	20.887	-1.079	0.25305	-4.1661	3.0985e-05	0.003172
ENSMUSG00000029056	Pank4	18.187	-1.1457	0.25762	-4.3356	1.4534e-05	0.0016965
ENSMUSG00000031668	Eif2ak3	59.915	-1.0079	0.22785	-4.3831	1.1699e-05	0.0014055
ENSMUSG00000037206	Islr	9.385	-1.2702	0.25758	-4.4067	1.0494e-05	0.001279
ENSMUSG00000026399	Cd55	99.567	-1.0604	0.23955	-4.4206	9.841e-06	0.0012125
ENSMUSG00000040918	Slc19a2	22.978	-1.0959	0.23626	-4.5211	6.1518e-06	0.0008064
ENSMUSG00000031125	3830403N18Rik	12.172	-1.2363	0.25316	-4.5993	4.2384e-06	0.00062393
ENSMUSG00000021250	Fos	153.75	-1.0415	0.22503	-4.6232	3.7784e-06	0.00056352
ENSMUSG00000022114	Spry2	68.62	-1.0335	0.21108	-4.8663	1.1373e-06	0.0001946
ENSMUSG00000034893	Cog3	199.53	-1.0126	0.20154	-5.0125	5.3731e-07	9.9843e-05
ENSMUSG00000020289	Nprl3	48.675	-1.0415	0.20417	-5.0505	4.4057e-07	8.5619e-05
ENSMUSG00000070354	Gm21975	61.124	-1.0808	0.21093	-5.0761	3.8528e-07	7.6617e-05
ENSMUSG00000040464	Gtpbp10	49.834	-1.0427	0.19773	-5.2159	1.8297e-07	4.0665e-05
ENSMUSG00000057315	Arhgap24	249.91	-1.0376	0.19567	-5.2976	1.1734e-07	2.83e-05
ENSMUSG00000021692	Dimt1	50.733	-1.2388	0.21821	-5.5931	2.2311e-08	6.1682e-06
ENSMUSG00000021519	Mterf3	157.78	-1.3363	0.23783	-5.6202	1.9076e-08	5.4057e-06
ENSMUSG00000042684	Npl	39.935	-1.3999	0.23988	-5.714	1.1038e-08	3.2081e-06
ENSMUSG00000054793	Cadm4	50.682	-1.4636	0.25552	-5.7153	1.0952e-08	3.2081e-06
ENSMUSG00000073016	Uprt	77.571	-1.2361	0.2128	-5.7643	8.1987e-09	2.5815e-06
ENSMUSG00000012483	Rpa3	70.485	-1.4085	0.24183	-5.7959	6.7966e-09	2.2659e-06
ENSMUSG00000022263	Trio	557.13	-1.0609	0.17773	-5.9647	2.4504e-09	8.6797e-07
ENSMUSG00000020630	Rnaseh1	132.71	-1.0175	0.1668	-6.0722	1.2621e-09	4.6789e-07
ENSMUSG00000028397	Kdm4c	78.573	-1.2192	0.1968	-6.139	8.3019e-10	3.3608e-07
ENSMUSG00000038622	Med30	141.67	-1.0395	0.16813	-6.1586	7.3375e-10	3.0804e-07
ENSMUSG00000096887	Gm20594	203.25	-1.2544	0.20201	-6.1942	5.8565e-10	2.5532e-07
ENSMUSG00000024084	Qpct	479.16	-1.2079	0.19443	-6.2054	5.455e-10	2.4733e-07
ENSMUSG00000024339	Tap2	141.75	-1.2758	0.20447	-6.2144	5.1526e-10	2.4335e-07
ENSMUSG00000019487	Trip10	43.474	-1.3528	0.20645	-6.3977	1.5774e-10	8.5143e-08
ENSMUSG00000025223	Ldb1	103.24	-1.3447	0.19881	-6.7159	1.8688e-11	1.1149e-08
ENSMUSG00000010392	Gosr1	98.981	-1.3329	0.18752	-7.0519	1.7649e-12	1.1768e-09
ENSMUSG00000038508	Gdf15	238.22	-1.4772	0.19874	-7.3996	1.3662e-13	9.679e-11
ENSMUSG00000020464	Pnpt1	112.59	-1.3359	0.1739	-7.6152	2.6333e-14	1.9899e-11
ENSMUSG00000028164	Manba	97.58	-1.5718	0.18562	-8.3538	6.6103e-17	5.352e-14
ENSMUSG00000023994	Nfya	156.4	-1.1933	0.14081	-8.4311	3.4231e-17	2.9847e-14
ENSMUSG00000058258	Idi1	208.01	-1.6796	0.19701	-8.4721	2.4094e-17	2.2759e-14
ENSMUSG00000004931	Apba3	108.48	-1.5307	0.16694	-9.0593	1.3133e-19	1.3533e-16
ENSMUSG00000021133	Susd6	194.55	-1.4567	0.15955	-9.076	1.1267e-19	1.2771e-16
ENSMUSG00000021224	Numb	211.06	-1.3235	0.14367	-9.1761	4.4692e-20	5.6287e-17
ENSMUSG00000027936	Crtc2	80.934	-1.9816	0.21004	-9.1787	4.3636e-20	5.6287e-17
ENSMUSG00000062115	Rai1	168.56	-1.6116	0.17052	-9.3772	6.7749e-21	1.0971e-17
ENSMUSG00000000171	Sdhd	227.51	-1.6627	0.17548	-9.4147	4.7463e-21	8.9666e-18
ENSMUSG00000038803	Ost4	386.82	-1.5297	0.15599	-9.7809	1.3604e-22	3.0839e-19
ENSMUSG00000040269	Mrps28	104.56	-2.0978	0.19796	-10.351	4.1238e-25	1.1686e-21
ENSMUSG00000015478	Rnf5	172.22	-1.8932	0.17972	-10.422	1.9707e-25	7.4461e-22
ENSMUSG00000004263	Atn1	113.69	-2.5596	0.19139	-12.812	1.4074e-37	1.5953e-33
