# Supplementary material for: Loss of Mir146b with aging contributes to inflammation and mitochondrial dysfunction in thioglycollate-elicited peritoneal macrophages
Source: eLife. 2021 Aug 23;10:e66703. doi: 10.7554/eLife.66703 (PMC8412946; doi:10.7554/eLife.66703)
Supplement: Figure 4—source data 3. [file elife-66703-fig4-data3.xlsx]

## Sheet: clusters.ONE_geno_signif
GeneID	Cluster
Psmb10	cluster1
Ggh	cluster1
Gdf15	cluster1
Saa3	cluster1
Slpi	cluster1
H2-Q7	cluster1
Clec4e	cluster1
Irg1	cluster1
AW112010	cluster1
Ccl5	cluster1
Mcemp1	cluster1
Hp	cluster1
Nupr1	cluster1
Ier3	cluster1
Sh3bp5	cluster1
Igfbp4	cluster1
Zbp1	cluster1
Isg15	cluster1
Il18bp	cluster1
Cox6a2	cluster1
Ifitm3	cluster1
Ly6e	cluster1
Irf7	cluster1
Fabp3	cluster1
Ccl4	cluster1
Wfdc17	cluster1
Fcna	cluster1
Pf4	cluster1
Napsa	cluster2
Slamf7	cluster2
Chchd10	cluster2
Trf	cluster2
Tspan17	cluster2
Gas5	cluster2
Dusp23	cluster2
Gm11808	cluster2
Gm8730	cluster2
Fdps	cluster2
Sdf2l1	cluster2
Apoe	cluster2
Lyz2	cluster2
Tmem37	cluster2
Ramp1	cluster2
Isyna1	cluster2
Tnfsf13os	cluster2
Srsf5	cluster3
Coro1c	cluster3
Mdfic	cluster3
Mrc1	cluster3
Tfrc	cluster3
Lpp	cluster3
Emc1	cluster3
BC005537	cluster3
Gm10263	cluster3
Yam1	cluster3
Mir6236	cluster3
Lpl	cluster3
Clec7a	cluster3
Hist1h1c	cluster3
Cd300ld	cluster3
Dusp1	cluster3
Hmgb2	cluster4
Ifi203	cluster4
Kctd12b	cluster4
Atp5l	cluster4
Gm10036	cluster4
Wdfy1	cluster4
Gm7536	cluster4
Rpl27-ps3	cluster4
Gpr183	cluster4
Lsp1	cluster4
Cd24a	cluster4
Erdr1	cluster4
Mir22hg	cluster4
Ptprs	cluster4
Dag1	cluster4
Cenpa	cluster4
Cgnl1	cluster4
Slc7a2	cluster4
Arrdc3	cluster4
Snhg9	cluster4
Arap2	cluster4
Arhgap39	cluster4
Suv420h2	cluster4
Hist1h2ap	cluster4
Pdcd4	cluster4
Dhcr24	cluster4
Traf6	cluster4
Ypel2	cluster4
Tnpo2	cluster4
Maoa	cluster4
Dach1	cluster4
AI606181	cluster4
Dnmt3aos	cluster4
Ptgir	cluster4
AA467197	cluster4
Cpeb1	cluster4
Rps4l	cluster4
Rasgrp3	cluster4
Clec7a	cluster4
Ccl8	cluster4
Lyz1	cluster4
Tsix	cluster4
Nfkbid	cluster4
Ermard	cluster4
Gm10175	cluster4
Nacc2	cluster4
Fam46c	cluster4
Lipo1	cluster4
Stk24	cluster4
Kcnj2	cluster4
Hopx	cluster4
Chil3	cluster4
Gpx3	cluster4
Sgsm2	cluster4
Fabp7	cluster4
Cmbl	cluster4
S100a4	cluster4
Ccl9	cluster4
Gpr137b-ps	cluster5
Bhlhe41	cluster5
Ttyh2	cluster5
Epas1	cluster5
Npy	cluster5
Pdpn	cluster5
Mfge8	cluster5
Dio2	cluster5
Fstl1	cluster5
Gstm2	cluster5
Mmp12	cluster5
Mamdc2	cluster5
Wfs1	cluster5
Gpc1	cluster5
Mgll	cluster5
Dlg3	cluster5
Dcbld2	cluster5
Sel1l3	cluster5
Matk	cluster5
Ltbp3	cluster5
Apbb2	cluster5
Ly75	cluster5
Mcoln3	cluster5
Ccr1	cluster5
Rassf8	cluster5
Ptrh1	cluster5
